# Supplementary material
Source: MDPI journal article supplement (https://www.mdpi.com/1424-2818/16/3/136)
Supplement: s1 [file s1]

**Supplementary Table S1.** List of the nineteen bottle gourd accessions used in the study with description of collection sites: origin, region and location.

| Code | Scientific name                           | Country of origin | Province/Region | Location            |
|------|-------------------------------------------|-------------------|-----------------|---------------------|
| G1   | <i>L. siceraria</i> var. <i>siceraria</i> | South Africa      | Limpopo         | Ga-Phasa            |
| G2   | <i>L. siceraria</i> var. <i>siceraria</i> | South Africa      | Limpopo         | Kgohloane           |
| G8   | <i>L. siceraria</i> var. <i>siceraria</i> | South Africa      | Limpopo         | Kgohloane           |
| G9   | <i>L. siceraria</i> var. <i>siceraria</i> | South Africa      | Limpopo         | Ga-Rapitsi          |
| G14  | <i>L. siceraria</i> var. <i>siceraria</i> | South Africa      | Limpopo         | Moletjie-Mabokelele |
| G15  | <i>L. siceraria</i> var. <i>siceraria</i> | South Africa      | KwaZulu-Natal   | La Lucia            |
| G19  | <i>L. siceraria</i> var. <i>hispida</i>   | India             |                 |                     |
| G20  | <i>L. siceraria</i> var. <i>siceraria</i> | Japan             |                 |                     |
| G21  | <i>L. siceraria</i> var. <i>hispida</i>   | Philippines       |                 |                     |
| G23  | <i>L. siceraria</i> var. <i>siceraria</i> | Chile             | Coquimbo        | Illapel             |
| G25  | <i>L. siceraria</i> var. <i>siceraria</i> | Chile             | Osorno          | Loncoche            |
| J2   | <i>L. siceraria</i> var. <i>hispida</i>   | Japan             | Kioto           | Kioto               |
| J6   | <i>L. siceraria</i> var. <i>hispida</i>   | Swiss             |                 |                     |
| J7   | <i>L. siceraria</i> var. <i>hispida</i>   | India             |                 |                     |
| J10  | <i>L. siceraria</i> var. <i>hispida</i>   | Taiwan            |                 |                     |
| J12  | <i>L. siceraria</i> var. <i>hispida</i>   | Thailand          |                 |                     |
| J13  | <i>L. siceraria</i> var. <i>hispida</i>   | Bangladesh        |                 |                     |
| J15  | <i>L. siceraria</i> var. <i>hispida</i>   | Japan             | Ibaraki         | Kanto               |
| J17  | <i>L. siceraria</i> var. <i>siceraria</i> | Japan             | Tochigi         | Tochigi             |

**Supplementary Table S2.** Averages for each cluster for root and morpho-agronomic traits.

| Cluster                                    | RL     | SA     | RV    | AvD  | NT      | DFF   | DMF   | NL     | NPrB | PH     |
|--------------------------------------------|--------|--------|-------|------|---------|-------|-------|--------|------|--------|
| J6, J10, J12                               | 930.2a | 465.8a | 18.8a | 1.6a | 2268.1a | 47.0a | 50.0a | 22.1b  | 4.4c | 60.3b  |
| G19, J13, J15,<br>J7, G14, G2,<br>G20, J17 | 754.8b | 357.6b | 14.2b | 1.5a | 1833.5b | 36.8c | 38.5c | 30.0a  | 6.7a | 86.4a  |
| G21, J2, G1,<br>G15, G23, G25,<br>G8, G9   | 560.7c | 249.5c | 9.1c  | 1.5a | 1391.1c | 40.6b | 40.6b | 26.9ab | 5.7b | 71.6ab |

Number of leaves (NL); plant height (PH); number of primary branches (NPrB); days to first female and male flowering (DFF and DMF, respectively); root length (RL); root surface area (SA); mean root diameter (AvD); number of tips (NT); root volume (RV). Means with different letters within a column are significantly different at p-value < 0.01 according to Fisher's LSD test.

**Supplementary Table S3.** Averages for each variety (hispidia and siceraria) for root and morpho-agronomic traits.

| Cluster   | RL    | SA    | RV   | AvD | NT     | DFF  | DMF  | NL   | NPrB | PH   |
|-----------|-------|-------|------|-----|--------|------|------|------|------|------|
| Siceraria | 662.7 | 303.3 | 11.4 | 1.5 | 1671.2 | 39.7 | 39.7 | 28.3 | 6.0  | 79.5 |
| Hispidia  | 743.0 | 357.9 | 14.3 | 1.6 | 1765.4 | 40.3 | 42.9 | 26.5 | 5.8  | 72.2 |

Number of leaves (NL); plant height (PH); number of primary branches (NPrB); days to first female and male flowering (DFF and DMF, respectively); root length (RL); root surface area (SA); mean root diameter (AvD); number of tips (NT); root volume (RV).
